# Supplementary material for: Virome Analysis of Aphid Populations That Infest the Barley Field: The Discovery of Two Novel Groups of Nege/Kita-Like Viruses and Other Novel RNA Viruses
Source: PubMed Central journal article supplement (PMC7154061; doi:10.3389/fmicb.2020.00509), 2020-04-07
Supplement: Data_Sheet_1.pdf [file Data_Sheet_1.pdf]

## Supplementary information

(Kondo et al., *Frontiers in Microbiology* 11, 509, 2020)

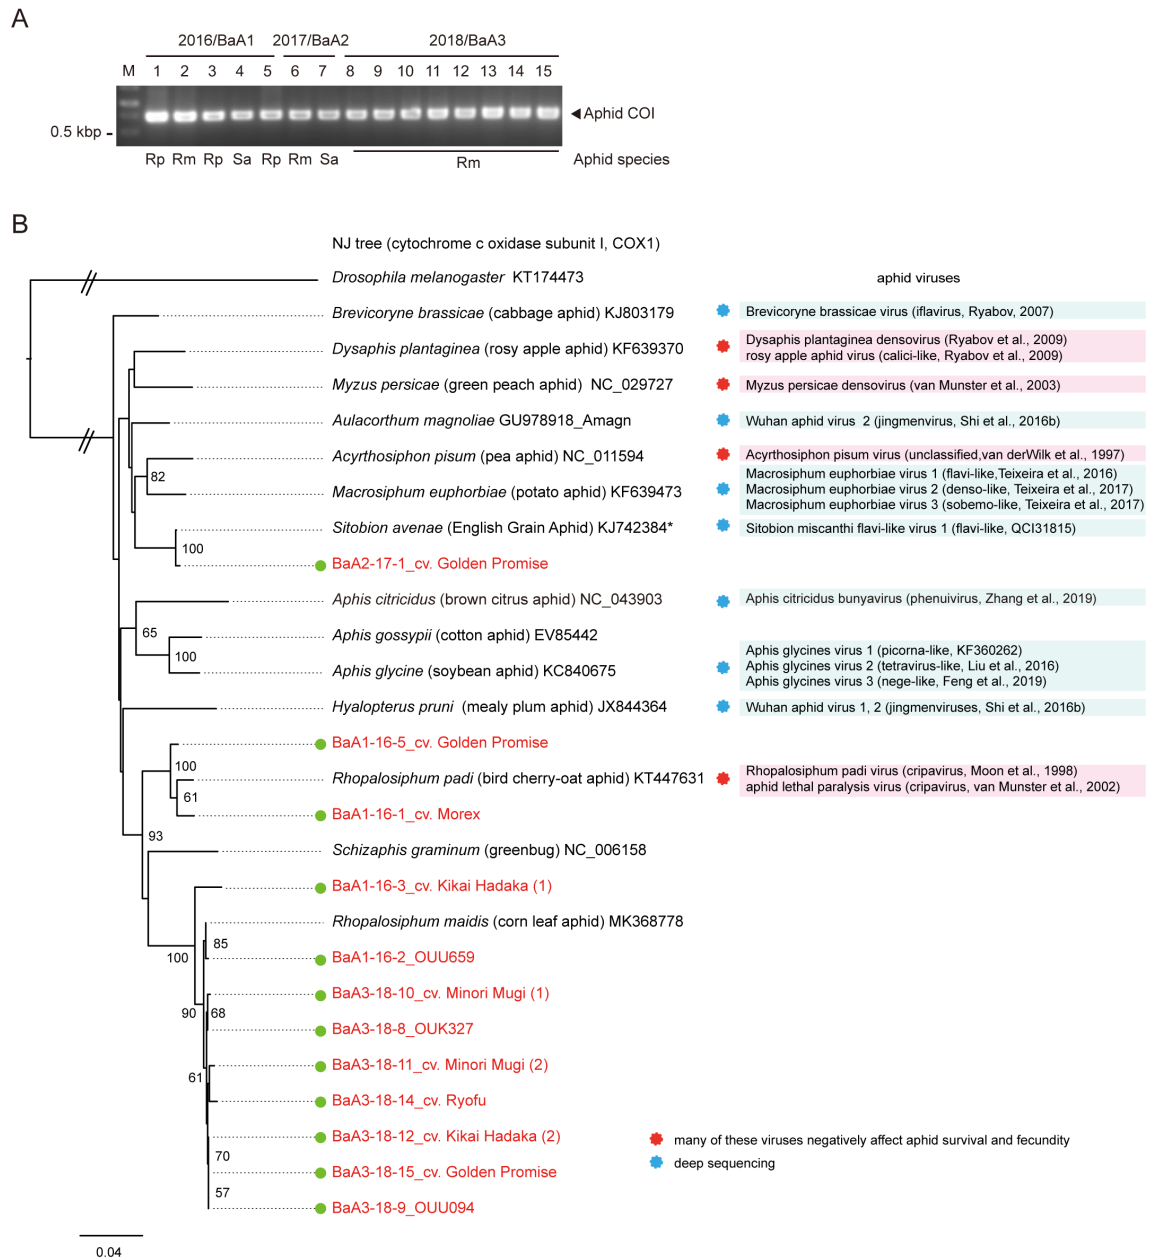

**FIGURE S1** | Identification of aphid species collected from the barley field. **(A)** PCR amplification of the 5' region of the mitochondrial cytochrome c oxidase 1 (COI) gene region using the DNA samples derived from each aphid specimen (see Table 1). PCR products were run on gel electrophoresis and stained with ethidium bromide. The species of aphid samples are indicated in the bottom of panel. Rp: *Rhopalosiphum padi*; Rm, *R. maidis*; Sa, *Sitobion avenae*. **(B)** Neighbor Joining (NJ) phylogenetic tree based on the nucleotide sequence of the 5' region of the mitochondrial COI gene of the aphid samples and submitted sequences (Table 1, selected). The accession number is shown for each aphid species with their common names in parentheses. The sequences obtained from this study are marked by a green circle. Reported aphid viruses or deposited genome sequences (mainly associated or originally isolated host species) of aphid viral-like agent (reported or unreported) including the references are shown on the right side of the aphid species name.

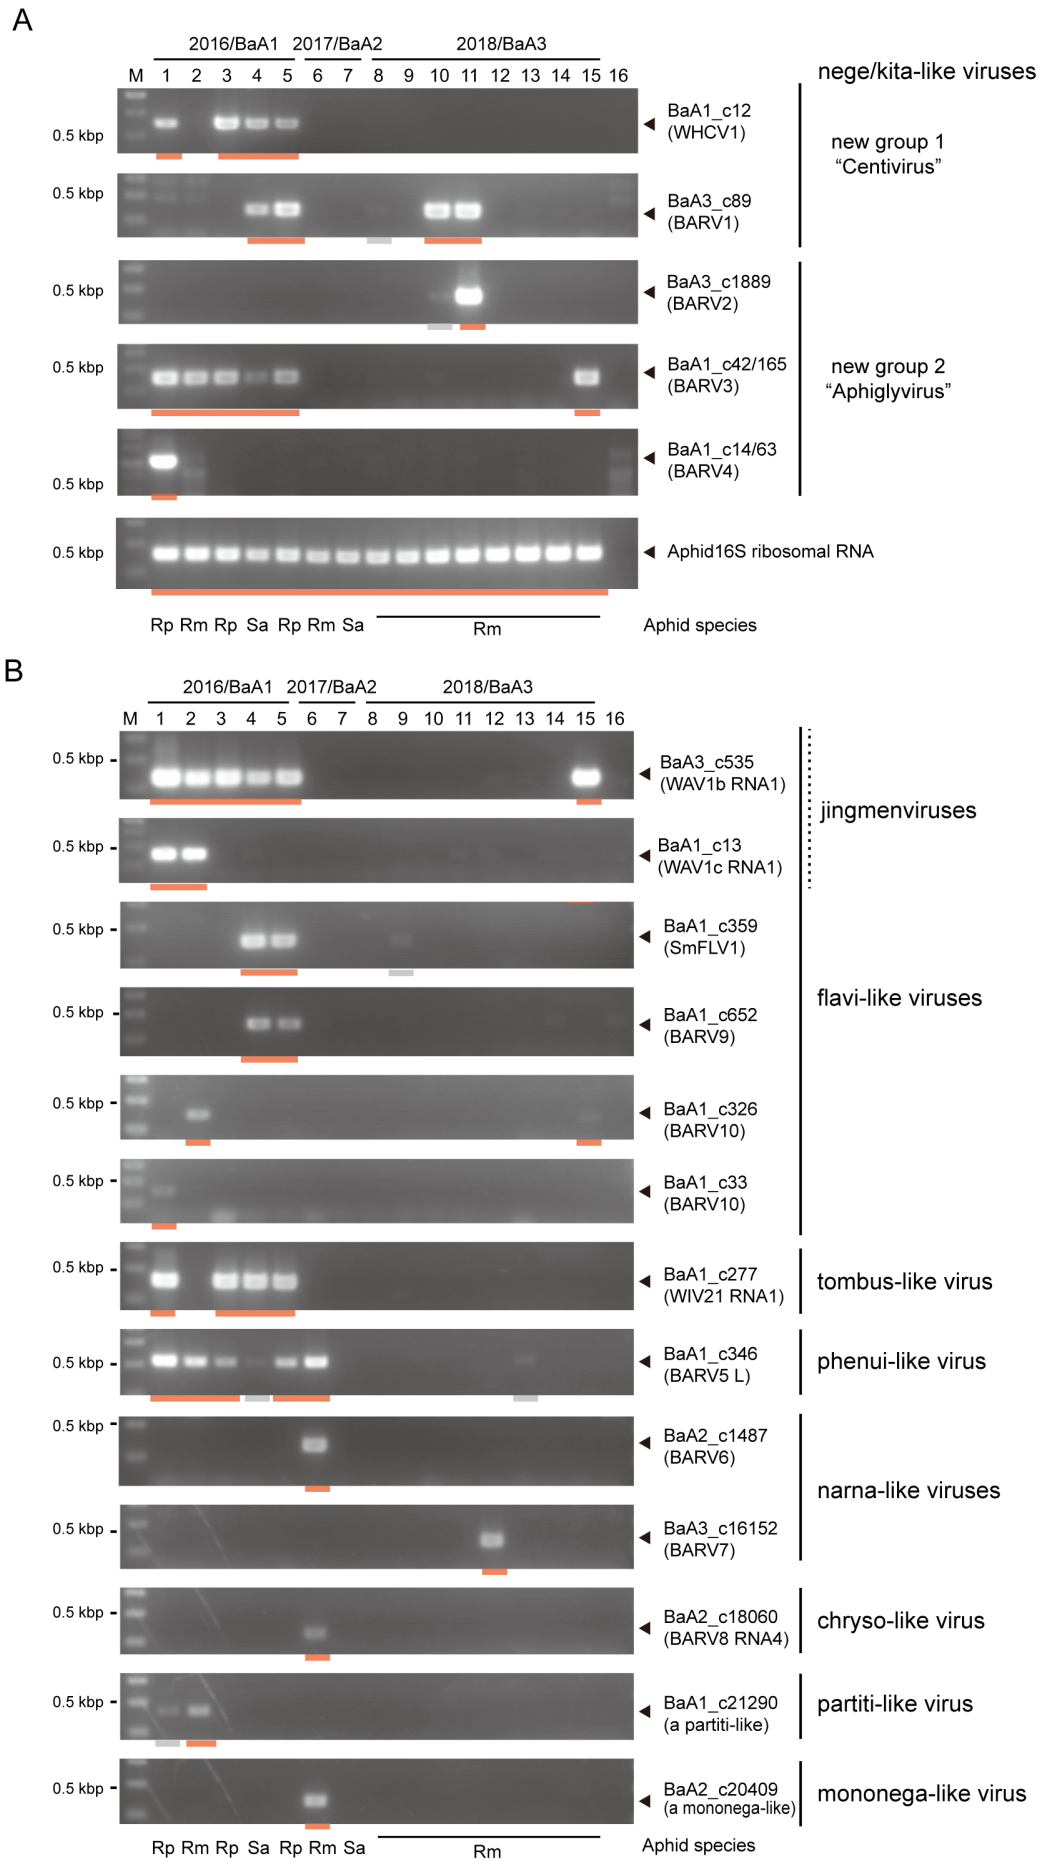

**FIGURE S2** | Detection of virus-like sequences in the aphid samples obtained from independent field colonies. **(A and B)** RT-PCR detection of the nege/kitavirus-like sequences (A) and other

RNA virus-like sequences (B) in the RNA samples derived from barley aphid populations (see Tables 1 and 2). The 16S ribosomal RNA gene of aphids was used as an endogenous mRNA reference. The species of aphid samples are indicated in the bottom of panels A and B (see Supplementary Fig. S1A). Rp: *Rhopalosiphum padi*; Rm, *R. maidis*; Sa, *Sitobion avenae*. A mixed DNA samples derived from three aphid species was included as a negative control for PCR (lane 16). Contig no. (abbreviation of tentative virus name) and suggested virus taxa are indicated in the left and right side of each gel image, respectively. The virus targets were amplified from the aphid RNA samples, but not from the genomic DNA derived from selected aphid species), indicating the exogenous origin of those viral sequences. Sequence analysis confirmed that the amplified DNA fragments were almost identical with the corresponding virus-like sequences identified through NGS. Some sequences do contain minor nucleotide sequence polymorphisms among the aphid populations (data not shown). The PCR products marked with red lines were subjected to conventional DNA sequencing, whereas those marked with grey lines were an insufficient quantity for the sequencing. DNA was stained with ethidium bromide and visualized under UV light.

Prediction of transmembrane helices  
in ORF 2 protein (putative G protein)

Prediction of transmembrane helices  
in ORF3 protein (SP24 family)

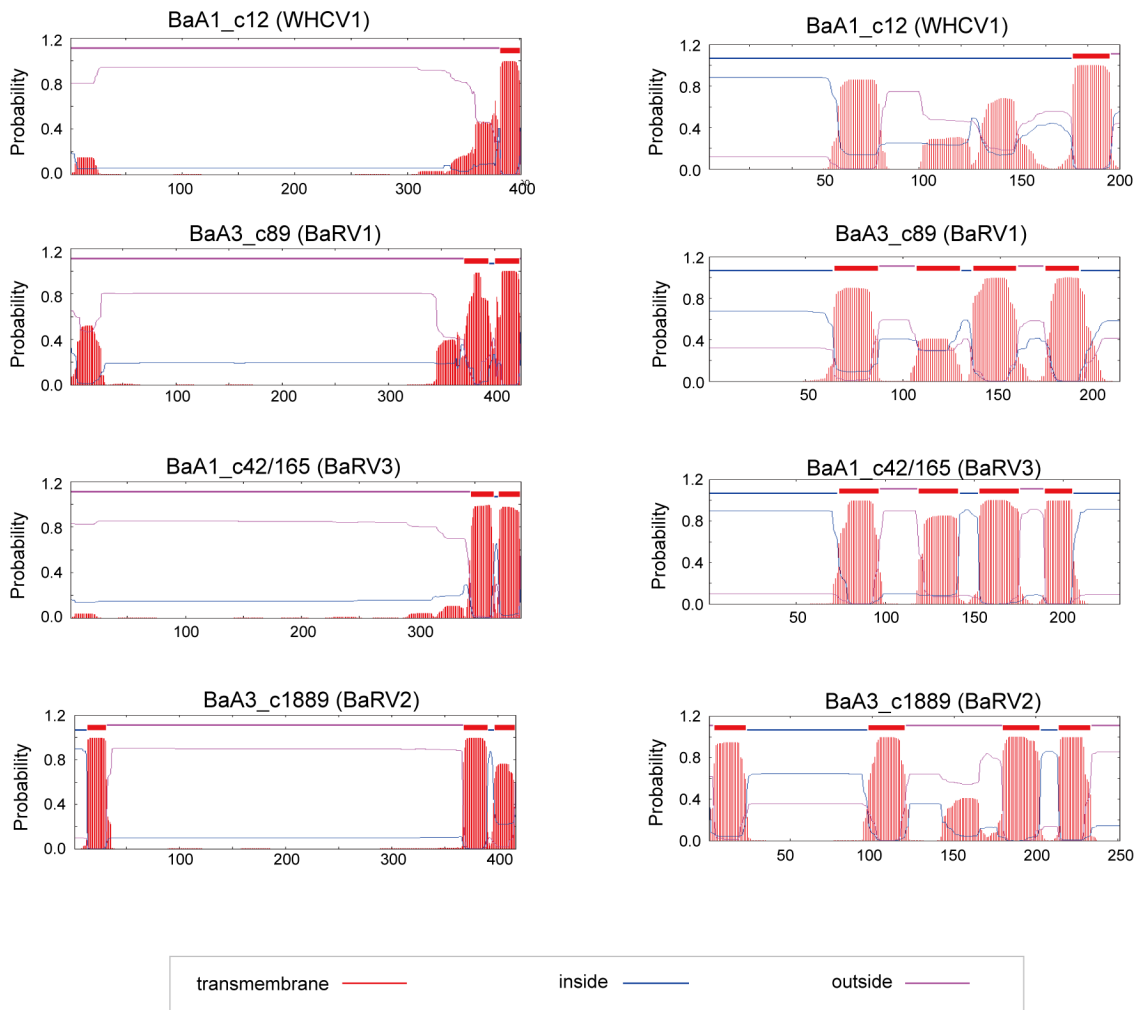

**FIGURE S3** | Predicted transmembrane domains (TM) of ORF2 protein (putative glycoprotein) and ORF3 protein (SP24 family) encoded by barley aphid-associated nege/kita-like viruses. TM was predicted using the TMHMM server version 2.0.

**A**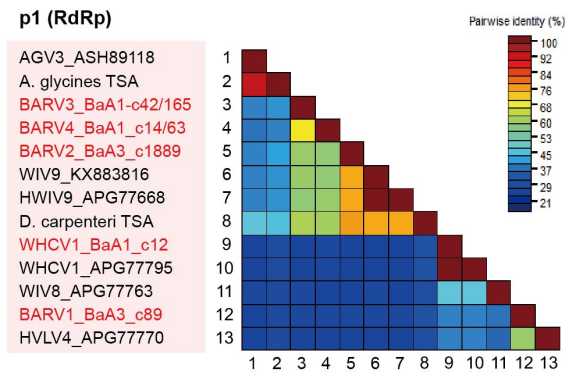**B**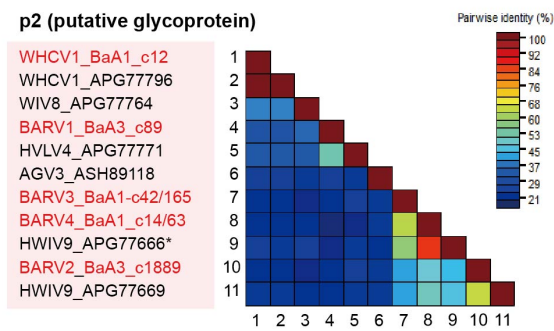**D**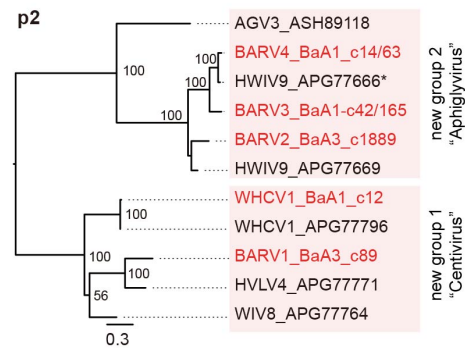**C**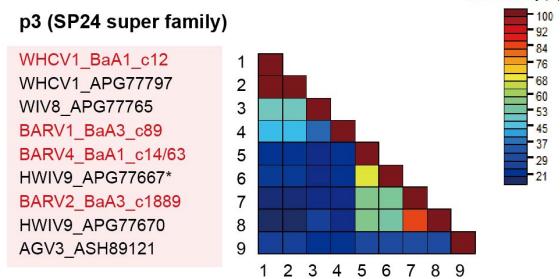**E**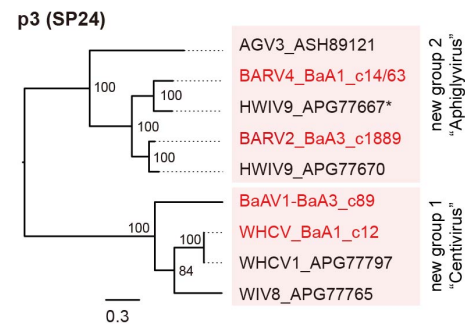

**FIGURE S4** | (A–C) Pairwise comparison of putative proteins encoded by nege/kita-like viruses (A, RdRp; B, p2 for putative glycoprotein; C, p3 for SP24 protein). Two BARV4-like protein sequences (APG77667 and APG77667, asterisked) derived from a partial viral genome (annotated as a putative HWIV9 strain) (Shi et al., 2016a) were also included in this analysis. Each color represents the relative pairwise amino acid identities (%) between corresponding proteins, calculated using SDT version 1.2 (Muhire et al., 2014). (D and E). NJ trees were constructed using MAFFT version 7 based on the multiple alignment of the potential glycoprotein p2 (D) and SP24 protein p3 (E), encoded by nege/kita-like viruses. Virus abbreviations are followed by GenBank accession numbers. The scale bar represents amino acid distances. The numbers at the nodes are bootstrap values of > 50%.

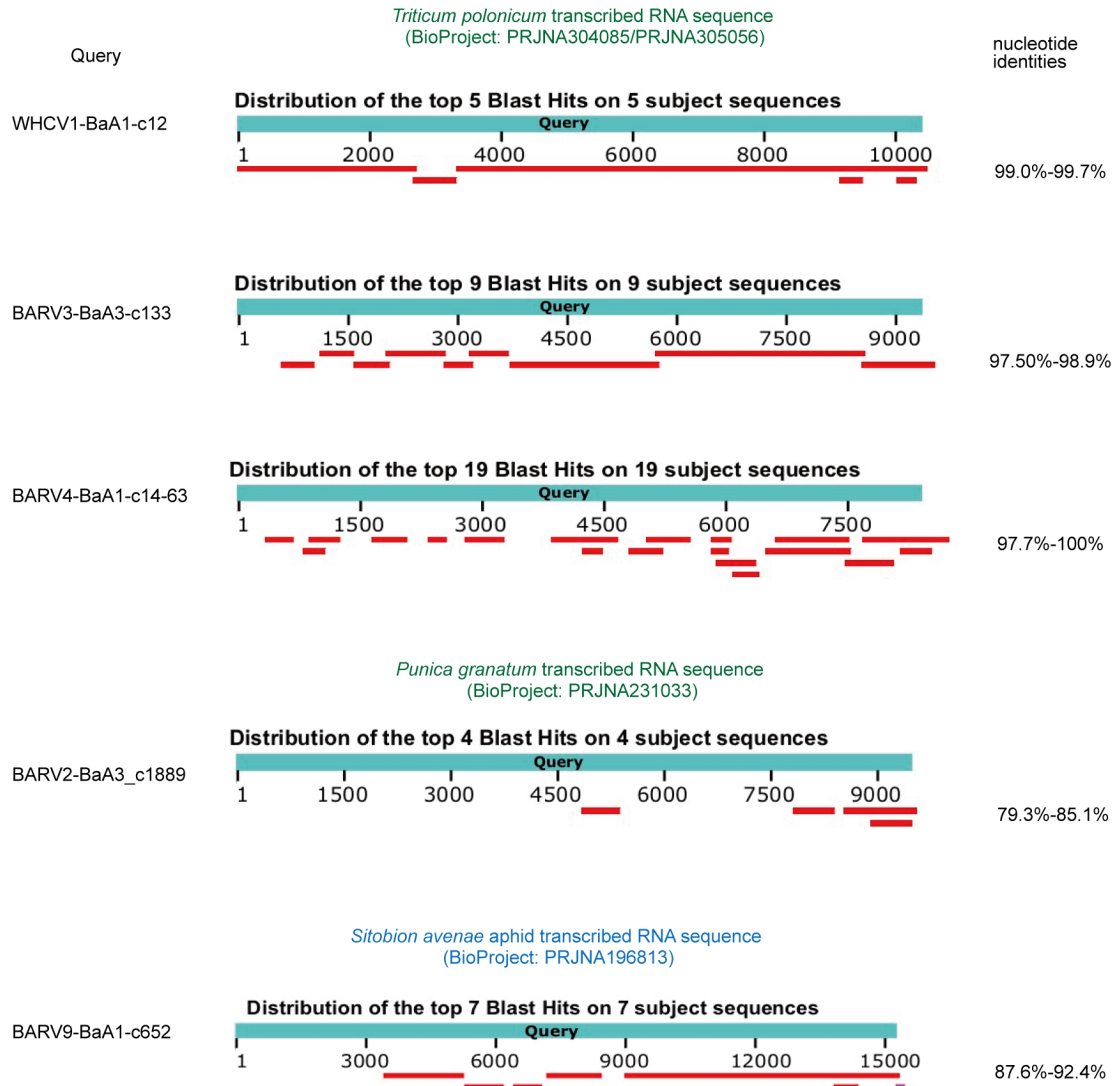

**FIGURE S5** | Blast-N results (graphical summary) using the assembled-contig sequences of nega/kita-like viruses (BaA1\_c12, BaA3\_c133 and BaA1\_c14/63) and a flavi-like virus (BaA1\_c652). The fragments of the nega/kita-like viruses-related sequences were found in the TSA datasets derived from the ornamented Polish wheat (*Triticum polonicum*) (BioProjects: PRJNA305056, leaves and PRJNA304085, stems; deposited by Wang, Y) or the pomegranate (*Punica granatum*, family Lythraceae) (BioProject: PRJNA231033, deposited by Ophir, R. and Mor, R), whereas flavi-like virus-related sequences were detected in TSAs from the English grain aphid (*Sitobion avenae*) (BioProject: PRJNA196813, deposited by Wang, D.).

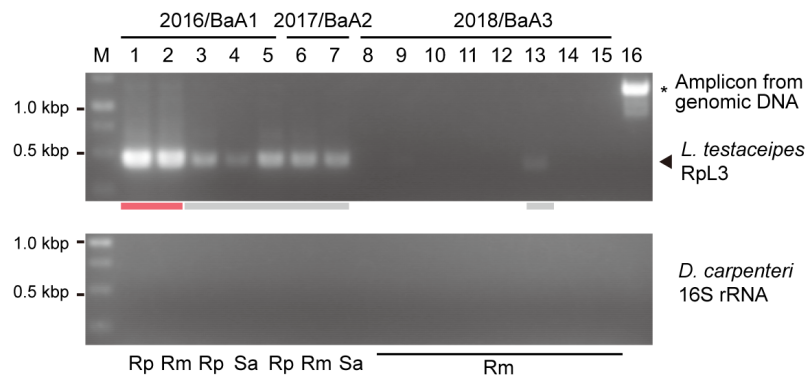

**FIGURE S6** | Detection of parasitoid sequences in the aphid samples obtained from independent field colonies. The ribosomal protein L3 (RpL3) gene of a primary parasitoid species *Lysiphlebus testaceipes* (**top panel**) and the 16S rRNA gene of a potential secondary parasitoid species *Dendrocerus carpenteri* (**bottom panel**) were used to confirm the infection of these parasitoids. The species of aphid samples are indicated in the bottom of panels. Rp: *Rhopalosiphum padi*; Rm, *R. maidis*; Sa, *Sitobion avenae*. A mixed DNA samples derived from three aphid species was also included as a control for PCR (lane 16). The PCR products marked with red lines were subjected to conventional DNA sequencing, whereas those marked with grey lines were not conducted or an insufficient quantity for the sequencing. DNA was stained with ethidium bromide and visualized under UV light.

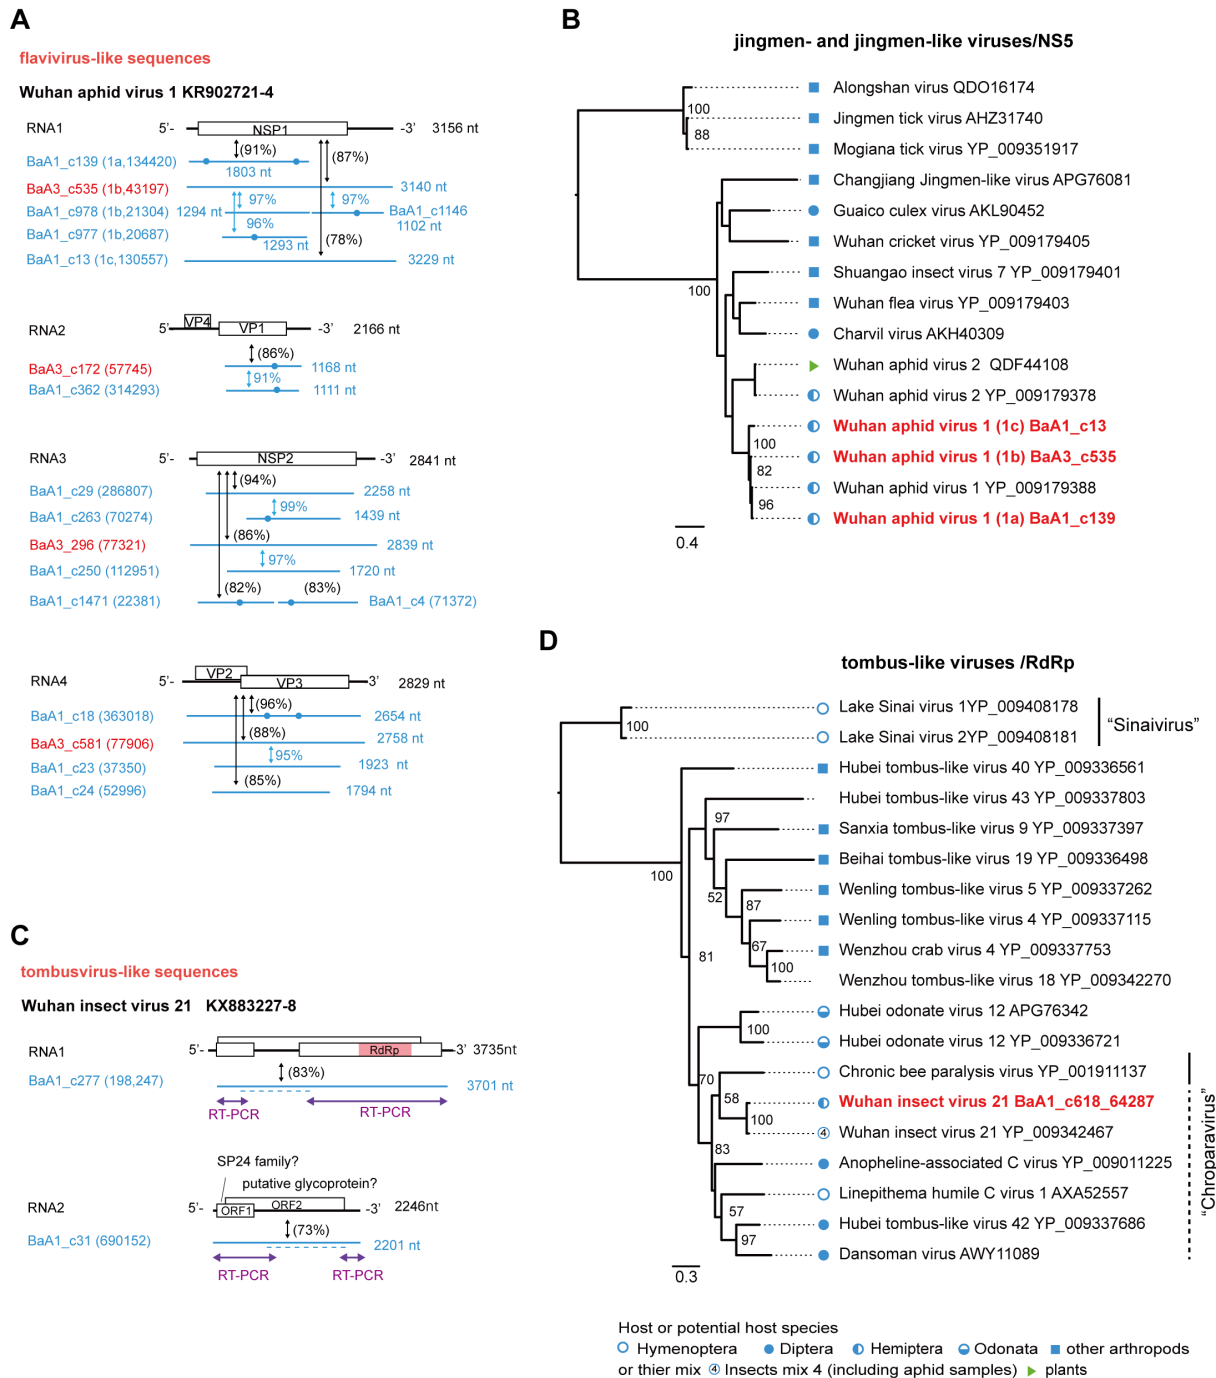

**FIGURE S7** | Genome organizations and phylogenetic relationships of jingmen- and jingmen-like viruses (flavi-like viruses) (**A and B**) and tombus-like viruses (**C and D**) of invertebrates. (**A and C**) The genome structures of Wuhan aphid virus 1 (WhAV-1, quadripartite genome segment) in **A** and Wuhan insect virus 21 (WhIV-21, bipartite genome segments) in **C**. Virus-like contigs in this study are shown as blue lines together with their read numbers in parentheses. The nucleotide sequence identities between a reference virus and a virus-like contig (in parentheses with black color) or two virus-like contigs (blue color with no parentheses) are shown. The ambiguous base region (Nn) in the contig sequences shows the blue circle. (**B and D**) Phylogenetic relationships of WhAV-1, jingmen- and jingmen-like viruses (**B**) and WhIV-21 and related tombus-like viruses (selected) (**D**). The ML trees were constructed using multiple amino acid sequence alignments of the sequences of NSP1 proteins in **B** or RdRp in **D**. Some members of jingmenviruses from ticks (**B**) or proposed genus Sinaivirus (**D**) were used as the outgroups, respectively. The scale bar represents amino acid distances. The numbers at the nodes are bootstrap values of > 50%.



**Table S1. Primer list.**

| <b>primer name</b> | <b>sequence (5' to 3')</b> | <b>target</b>            | <b>size</b> |
|--------------------|----------------------------|--------------------------|-------------|
| WHCV1_BaA1c12F     | TGGAGTTTACCACCCGTTTCCGGTG  | WHCV1                    | 610 bp      |
| WHCV1_BaA1c12R     | TGTCTGGTCGATGTAGGCGGTTTCC  |                          |             |
| HVLV4_BaA1c637F    | CTGTCCGGGTGCAGTTGTGTCACCT  | BaRV1                    | 352 bp      |
| HVLV4_BaA1c637R    | GGAATTCATGTACGGTAGCGACACG  |                          |             |
| WIV9_BaA3c1889F    | TAACACAAAATTGTACGATCCGTGC  | BaRV2                    | 464 bp      |
| WIV9_BaA3c1889R    | CATAATTGAGCATTACATCAGTGCC  |                          |             |
| WIV9a_BaA3c133F    | TGTCATGACGATATTGCTTTAACGG  | BaRV3                    | 370 bp      |
| WIV9a_BaA3c133R    | GGTAATCATTTCATATGGAACGAGC  |                          |             |
| WIV9b_BaA1c14-c63F | CGGTATATTTGAAGGATGTCGGCGG  | BaRV4                    | 914 bp      |
| WIV9b_BaA1c14-c63R | GTAATTC AACAGGCCCGTATTCGAC |                          |             |
| WAV1_BaA3c535F     | ACATCTGAATTCACTAGAAGCCAGC  | WAV1b S1                 | 325 bp      |
| WAV1_BaA3c535R     | GGGATGGTATGTTAAGAGGGATGTC  |                          |             |
| WAV1_BaA1c13F      | CGCACCGATATATGCCAACCCGTG   | WAV1c S1                 | 384 bp      |
| WAV1_BaA1c13R      | TCTGGGTCATAGACTAATTCTCTC   |                          |             |
| BaFlab_BaA1c359F   | ACCCGAAATATCTCCCATCGGGTA   | SmFLV1                   | 365 bp      |
| BaFlab_BaA1c359R   | GTCTTCAAACCTCCTGCGTCGAAC   |                          |             |
| BaFlab_BaA1c652F   | ACCCCAAGTTCCTTCCCAGGAGCG   | BaRV9                    | 364 bp      |
| BaFlab_BaA1c652R   | TGTCTCAAATCCATTTACTAAGG    |                          |             |
| BaFlab_BaA1c326F   | ATCCTAAGTATCTCCCTTCTTCTG   | BaRV10a                  | 364 bp      |
| BaFlab_BaA1c326R   | TGTTTCAAATTAAGCTCGCTGAAG   |                          |             |
| BaFlab_BaA1c33F    | ACCCTAAGTACCTTCCAGCCTCAG   | BaRV10b                  | 364 bp      |
| BaFlab_BaA1c33R    | TGCTTCAAATTAAGCTCATTGAAA   |                          |             |
| WIV21_BaA1c261F    | CACCCAGGGGGTGAGCTCTTACGGG  | WIV21-S1                 | 393 bp      |
| WIV21_BaA1c261R    | TTGGCGTTGCCAGTGTCATAGTGG   |                          |             |
| BunA_BaA1c346F (U) | TAGAAGAAGAGATAGAGAAGAATGC  | BaRV5-L                  | 530 bp      |
| BunA_BaA1c346R (U) | CTTTTGGTGGCTTGAACAGTTTGAT  | (universal)              |             |
| Narna_BaA2c1487F   | TTGCGAGGTTACCAACCACCTGGCC  | BaRV6                    | 328 bp      |
| Narna_BaA2c1487R   | AAATGCGGTACAACCGCGGCCAAC   |                          |             |
| Narna_BaA3c16152F  | GTAGCATCGGCAAGGTGCTGCTGGG  | BaRV7                    | 337 bp      |
| Narna_BaA3c16152R  | CAGTGCCAAGTGGTCAGACTCGAGG  |                          |             |
| Chryso_BaA2c18060F | CTTTACGAAGCTGTGGTGATACCA   | BaRV8-S4                 | 334 bp      |
| Chryso_BaA2c18060R | CACAGAGTTGCCCGTGAATAATGGC  |                          |             |
| HPLV28_BaA1c21290F | ACGCGACAGAAGTTTGACCCACTAG  | partiti                  | 411 bp      |
| HPLV28_BaA1c21290R | AAGGTGGTTGATAACGGCCATAGG   | -like                    |             |
| Rhab_BaA2c20409F   | GTCAATCAAGACAGTTTACCGCCTC  | mononega                 | 304 bp      |
| Rhab_BaA2c20409R   | AAGTCTTACAGATACCTGCTTGTGC  | -like                    |             |
| LepF               | ATTCAACCAATCATAAAGATATTGG  | COI                      |             |
| LepR               | TAAACTTCTGGATGTCCAAAAATCA  | (mitochondrial)          |             |
| Apisum16S_F        | TAGAAACCAACCTGGCTTACAC     | 16S rRNA                 |             |
| Apisum16S_R        | TGACTGTGCAAAGGTAGCATAA     | (aphid)                  |             |
| L.testa_RpL3_F     | ACCACATGGTCTTTCGTGCCTTGAC  | RpL3                     |             |
| L.testa_RpL3_R     | GGGAAGTTTCTTTGTGTGCCAACG   | (a primary parasitoid)   |             |
| DcarpF             | GTAAACTGGAATGAATGATTTAATA  | 16S rRNA                 |             |
| DcarpR             | TCGAGGTGCGCAAATAACTTA      | (a secondary parasitoid) |             |

**TABLE S2 | Nege/kitavirus-like sequences identified from plant and insect transcriptome shotgun assembly (TSA) database (selected).**

| Species                                                           | Sequence ID               | tBlastN result |         | Identity |
|-------------------------------------------------------------------|---------------------------|----------------|---------|----------|
|                                                                   |                           | Length (nt)    | e-value |          |
| <b>query sequence: BaA3_c89 (BARV1, ORF1 protein/replicase)</b>   |                           |                |         |          |
| <b><u>Insects (taxid:6960)</u></b>                                |                           |                |         |          |
| <i>Pipiza noctiluca</i>                                           | GCMW01018816              | 9,154          | 0.0     | 36.9%    |
| <i>Gynaikothrips ficorum</i>                                      | GAXG02092511              | 11,979         | 2e-125  | 34.8%    |
| <i>Elasmus</i> sp.                                                | GCUU01019316              | 10,219         | 4e-100  | 27.9%    |
| <i>Sapygina decemguttata</i>                                      | GBPQ01019499              | 10,856         | 2e-56   | 35.8%    |
| <b><u>dicotyledons (taxid:71240)</u></b> <sup>1</sup>             |                           |                |         |          |
| <i>Glycine dolichocarpa</i>                                       | GGIW01007835              | 3,916          | 8e-132  | 33.2%    |
|                                                                   | GGIW01009300              | 6,508          | 5e-103  | 49.8%    |
| <i>Camellia sinensis</i>                                          | GFMV01053955              | 1,297          | 2e-112  | 46.4%    |
|                                                                   | GARM01000567              | 4,059          | 3e-54   | 31.0%    |
| <i>Paulownia tomentosa</i>                                        | GEFV01158142 <sup>2</sup> | 6,147          | 9e-31   | 27.1%    |
|                                                                   | GEFV01018191 <sup>2</sup> | 3,678          | 0.0     | 37.9%    |
| <b>query sequence: BaA3_c1889 (BARV2, ORF1 protein/replicase)</b> |                           |                |         |          |
| <b><u>Insects (taxid:6960)</u></b>                                |                           |                |         |          |
| <i>Dendrocerus carpenteri</i>                                     | GBOS01003231              | 4,883          | 0.0     | 73.1%    |
|                                                                   | GBOS01024749              | 1,021          | 0.0     | 86.3%    |
| <i>Aphis glycines</i>                                             | GBSU01054579              | 7,744          | 0.0     | 40.1%    |
| <i>Aphis craccivora</i>                                           | GAJW01005232              | 705            | 0.0     | 95.8%    |
| <i>Lygaeus turcicus</i>                                           | GCYB01060845              | 9,355          | 2e-48   | 32.8%    |

<sup>1</sup> These were also hit with the BaA3\_c1889 ORF1 protein sequence as a query.

<sup>2</sup> Their potential encoding proteins are related with those of blunerviruses encoding RdRp and methyltransferase/helicase proteins.

**Table S3 | List of sandewaviruses, nelorpiviruses and phenuiviruses (genus type members) indicated in Figures 4 and 6 rectangles.**

| Taxa/<br>Genus                                                 | Virus name                               | Genbank accession |
|----------------------------------------------------------------|------------------------------------------|-------------------|
| <b>Fig. 4 rectangles</b>                                       |                                          |                   |
| <b>“Sandewavirus” (Unassigned)</b>                             |                                          |                   |
|                                                                | Santana virus                            | AFI24675          |
|                                                                | Wallerfield virus                        | AHH60914          |
|                                                                | Goutanap virus                           | AIL49273          |
|                                                                | Dezidougou virus                         | AFI24669          |
|                                                                | Tanay virus                              | AHX42599          |
|                                                                | Bustos virus                             | BAU71147          |
| <b>“Nelorpivirus” (Unassigned)</b>                             |                                          |                   |
|                                                                | Negev virus                              | AFI24672          |
|                                                                | Ngewotan virus                           | AFY98072          |
|                                                                | Brejeira virus                           | AIS40884          |
|                                                                | Piura virus                              | AFI24678          |
|                                                                | Castlerea virus                          | AQZ55408          |
|                                                                | Okushiri virus                           | BAS69360          |
|                                                                | Ying Kou virus                           | AYL60135          |
| <b>Fig. 6 rectangle</b>                                        |                                          |                   |
| <b>Family <i>Phenuiviridae</i> (order <i>Bunyavirales</i>)</b> |                                          |                   |
| <i>Goukovirus</i>                                              | Gouleako virus                           | AEJ38175          |
| <i>Phasivirus</i>                                              | Badu virus                               | AMA19446          |
| <i>Phlebovirus</i>                                             | Rift Valley fever virus                  | YP_003848704      |
| <i>Tenuivirus</i>                                              | rice stripe virus                        | NP_620522         |
| <i>Beidivirus</i>                                              | Hubei diptera virus 3                    | APG79285          |
| <i>Horwuvirus</i>                                              | Wuhan horsefly virus                     | AJG39260          |
| <i>Hudivirus</i>                                               | Hubei diptera virus 4                    | APG79298          |
| <i>Hudovirus</i>                                               | Hubei lepidoptera virus 1                | APG79261          |
| <i>Pidchovirus</i>                                             | Pidgey virus                             | KX852391          |
| <i>Wubeivirus</i>                                              | Wuhan fly virus 1                        | AJG39259          |
| Banyangvirus                                                   | severe fever with thrombocytopenia virus | AMT85885          |
| Mobuvirus                                                      | Mothra bunyavirus                        | AOF41426          |
| Wenrivirus                                                     | Whenzhou shrimp virus 1                  | AJG39256          |

**TABLE S4 | BLAST results for nege/kita-like viruses from the barley aphid transcriptomes.**

| Query contig <sup>1</sup>                 | top hit virus                                      | Nucleotide seq Identity (QC) <sup>2</sup> | A. A. seq Identity (QC) | Accession <sup>3</sup> |
|-------------------------------------------|----------------------------------------------------|-------------------------------------------|-------------------------|------------------------|
| <b>Flavi/jingmen-like virus sequences</b> |                                                    |                                           |                         |                        |
| BaA1_c139                                 | Wuhan aphid virus 1 S1 <sup>5</sup>                | 91% (0.0)                                 | 92% (0.0)               | KR902721               |
| BaA3_c535                                 | Wuhan aphid virus 1 S1                             | 87% (0.0)                                 | 95% (0.0)               | KR902721               |
| BaA1_c13                                  | Wuhan aphid virus 1 S1                             | 78% (0.0)                                 | 87% (0.0)               | KR902721               |
| BaA1_c362                                 | Wuhan aphid virus 1 S2                             | 86% (0.0)                                 | 90% (1e-150)            | KR902722               |
| BaA3_c172                                 | Wuhan aphid virus 1 S2                             | 86% (0.0)                                 | 87% (3e-141)            | KR902722               |
| BaA1_c29                                  | Wuhan aphid virus 1 S3                             | 94 % (0.0)                                | 99% (0.0)               | KR902723               |
| BaA3_c296                                 | Wuhan aphid virus 1 S3                             | 86% (0.0)                                 | 94% (0.0)               | KR902723               |
| BaA1_c1471/4 <sup>4</sup>                 | Wuhan aphid virus 1 S3                             | 83% (0.0)                                 | 78% (0.0)               | KR902723               |
| BaA1_c18                                  | Wuhan aphid virus 1 S4                             | 96% (0.0)                                 | 84% (0.0)               | KR902724               |
| BaA3_c581                                 | Wuhan aphid virus 1 S4                             | 88% (0.0)                                 | 93% (0.0)               | KR902724               |
| BaA1_c24                                  | Wuhan aphid virus 1 S4                             | 84% (0.0)                                 | 78% (0.0)               | KR902724               |
| BaA1_c359                                 | Sitobion miscanthi flavi-like virus 1              | 92% (0.0)                                 | 98% (0.0)               | MH778148               |
| BaA3_c3690                                | Sitobion miscanthi flavi-like virus 1              | 67% (0.0)                                 | 44% (0.0)               | MH778148               |
| BaA1_c326                                 | Sitobion miscanthi flavi-like virus 1              | 67% (0.0)                                 | 44% (0.0)               | MH778148               |
| BaA1_c652                                 | Macrosiphum euphorbiae virus 1                     | 73% (0.0)                                 | 62% (0.0)               | KT309079               |
| BaA1_c33                                  | Sitobion miscanthi flavi-like virus 1              | 68% (0.0)                                 | 59% (0.0)               | MH778148               |
| BaA1_c194                                 | Sitobion miscanthi flavi-like virus 1              | 69% (4e-116)                              | 35% (0.0)               | MH778148               |
| BaA1_c1578                                | Macrosiphum euphorbiae virus 1                     | 63% (9e-29)                               | 46% (0.0)               | MH778148               |
| BaA1_c891                                 | Macrosiphum euphorbiae virus 1                     | 70% (5e-159)                              | 53% (0.0)               | KT309079               |
| <b>tombus-like virus sequences</b>        |                                                    |                                           |                         |                        |
| BaA1_c277                                 | Wuhan insect virus 21 S1 (RdRp)                    | 83% (0.0)                                 | 90% (0.0)               | KX883227               |
| BaA1_c31                                  | Wuhan insect virus 21 S2 (ORF1)                    | 73% (3e-63)                               | 52% (0.0)               | KX883228               |
| <b>phenui-like virus sequences</b>        |                                                    |                                           |                         |                        |
| BaA1_c346                                 | Hubei bunya-like virus 2 (L protein <sup>5</sup> ) | no hits                                   | 35% (0.0)               | APG79269               |
| BaA2_c4524                                | Hubei bunya-like virus 2 (L protein)               | no hits                                   | 35% (0.0)               | APG79269               |
| <b>other virus-like sequences</b>         |                                                    |                                           |                         |                        |
| BaA2_c1487                                | Aedes angustivittatus narnavirus (RdRp)            | no hits                                   | 34% (3e-77)             | QBA55490               |
| BaA3_c16152                               | Aedes angustivittatus narnavirus (RdRp)            | no hits                                   | 30% (3e-42)             | QBA55490               |
| BaA2_c19028                               | Shuangao chryso-like virus 1 S1(RdRp)              | no hits                                   | 37% (0.0)               | ASA47445               |
| BaA2_c18060                               | Shuangao chryso-like virus 1 S4 (HP <sup>5</sup> ) | no hits                                   | 24% (1e-22)             | ASA47448               |
| BaA2_21290                                | Hubei partiti-like virus 28 (RdRp)                 | no hits                                   | 66% (0.0)               | APG78273               |
| BaA2_c20409                               | Linepithema humile rhabdo-like virus (L)           | no hits                                   | 40% (3e-86)             | AXA52562               |

<sup>1</sup> Pool-1: BaA1; Pool-2: BaA2; Pool-3: BaA3.

<sup>2</sup> Nucleotide sequence identity with the entire contig sequences from BlastN (discontiguous megablast) analyses. QC: query coverage (%).

<sup>3</sup> Accession numbers of nucleotide or protein sequences for the best hit viruses.

<sup>4</sup> A concatenate sequence of two contig fragments, potentially derived from the same viral variant (see Fig. S4).

<sup>5</sup> S, segment; L, large (RdRp); HP, hypothetical protein.
